# Supplementary material for: The MSOAC approach to developing performance outcomes to measure and monitor multiple sclerosis disability
Source: PubMed Central journal article supplement — Mult Scler. 2017 Aug 11;24(11):1469–84. doi: 10.1177/1352458517723718 (PMC6174619; doi:10.1177/1352458517723718), 2017-08-11
Supplement: MSJ723718_supplementary_files.pdf [file MSJ723718_supplementary_files.pdf]

## **SUPPLEMENTARY FILES**

**Supplementary Table 1: MSOAC Workgroups and Members**

**Supplementary Table 2: Search Terms, Databases, and Time Frame**

**Supplementary Table 3: Abstract Filtering Process**

**Supplementary Table 4: Data Extraction Table (separate pdf)**

**Supplementary Text for the Statistical Analysis Plan**

## Supplementary Table 1: MSOAC Workgroups and Members

### Coordinating Committee

**Nicholas LaRocca**

**Richard Rudick**

**Lynn Hudson**

Elizabeth Merikle

Jane Haley

Steve Hass

Steven Greenberg

Thomas Marshall

Xiaolan Ye

Matthew Sidovar

Craig Sherburne

Bjorn Sperling

Claudia Ordonez

Gilmore O'Neill

Glenn Phillips

Jacob Elkins

John Richert

Sanjay Keswani

Tanuja Chitnis

Deborah Miller

Jeffrey Cohen

Ann Robbins

Emily Hartley

Enrique Aviles

Gary Lundstrom

Jon Neville

Geoffrey Dunbar

Tanya Fischer

Thorsten Eickenhorst

Maria Isaac

Kathy Smith

Elektra Papadopoulous

Indira Hills

Marc Walton

Michelle Campbell

Sarrit Kovacs

Susan Montenegro

Wen-Hung Chen

Irina Antonijevic

**MSOAC Co-Director**; National MS Society

**MSOAC Co-Director**; Cleveland Clinic, Biogen

**MSOAC Co-Director**; Critical Path Institute

AbbVie

AbbVie

AbbVie

AbbVie

AbbVie

AbbVie

Acorda

Alberta MS Research Foundation

Biogen

Biogen

Biogen

Biogen

Biogen

Biogen

Bristol-Myers Squibb

Brigham and Women's Hospital

Cleveland Clinic

Cleveland Clinic

Critical Path Institute

EMD Serono

EMD Serono

EMD Serono

European Medicines Agency

Fast Forward (NMSS)

Food and Drug Administration

Genzyme/Sanofi

|                     |                                                         |
|---------------------|---------------------------------------------------------|
| Jennifer Panagoulas | Genzyme/Sanofi                                          |
| Michael Panzara     | Genzyme/Sanofi                                          |
| Maria Davy          | GlaxoSmithKline                                         |
| Paul Thompson       | GlaxoSmithKline                                         |
| Paul Matthews       | Imperial College London                                 |
| Gill Webster        | Innate Immunotherapeutics                               |
| Simon Wilkinson     | Innate Immunotherapeutics                               |
| Ellen Mowry         | Johns Hopkins University                                |
| Peter Calabresi     | Johns Hopkins University                                |
| Nancy Mayo          | McGill                                                  |
| Ed Holloway         | MS Society (UK)                                         |
| Fred Lublin         | Mt Sinai School of Medicine                             |
| Ursula Utz          | National Institute of Neurological Disorders and Stroke |
| Timothy Coetzee     | National MS Society                                     |
| Weyman Johnson, JD  | National MS Society                                     |
| Laura Balcer        | New York University                                     |
| David Leppert       | Novartis                                                |
| Frank Dahlke        | Novartis                                                |
| Richard Meibach     | Novartis                                                |
| Gordon Francis      | Novartis/Consultant                                     |
| Jeremy Hobart       | Plymouth Hospital                                       |
| Adam Jacobs         | Premier Research                                        |
| Shari Medendorp     | Premier Research                                        |
| Algirdas Kakrieka   | Roche/Genentech                                         |
| Bruno Musch         | Roche/Genentech                                         |
| Donna Masterman     | Roche/Genentech                                         |
| Peter Chin          | Roche/Genentech                                         |
| Giancarlo Comi      | Scientific Institute H.S. Raffaele, Italy               |
| Ralph Benedict      | State University of NY - Buffalo                        |
| Lauren Krupp        | Stony Brook Medicine                                    |
| Joshua Steiner      | Teva                                                    |
| Matthew Davis       | Teva                                                    |
| Volker Knappertz    | Teva                                                    |
| Elizabeth Morrison  | UC Irvine                                               |
| Raj Kapoor          | University College London Institute of Neurology        |
| Gary Cutter         | University of Alabama Birmingham                        |
| Maria Pia Sormani   | University of Genoa                                     |
| Robert Motl         | University of Illinois                                  |
| Brenda Banwell      | University of Pennsylvania                              |
| Myla Goldman        | University of Virginia                                  |
| Bernard Uitdehaag   | VU University Medical Center                            |

### **Defining Disability Workgroup (DD)**

|                        |                                               |
|------------------------|-----------------------------------------------|
| <b>Jeremy Hobart</b>   | <b>Workgroup Co-Chair</b> ; Plymouth Hospital |
| <b>Donna Masterman</b> | <b>Workgroup Co-Chair</b> ; Roche/Genentech   |
| Jane Haley             | AbbVie                                        |
| Matthew Sidovar        | Acorda                                        |
| Glenn Phillips         | Biogen                                        |
| Jacob Elkins           | Biogen                                        |
| Jeffrey Cohen          | Cleveland Clinic                              |
| Gary Lundstrom         | Critical Path Institute                       |
| Lynn Hudson            | Critical Path Institute                       |
| Stephen Coons          | Critical Path Institute                       |
| David Margolin         | Genzyme/Sanofi                                |
| Nancy Mayo             | McGill                                        |
| Nicholas LaRocca       | National MS Society                           |
| Ralph Benedict         | State University of NY - Buffalo              |

### **COA and Data Analysis Workgroup (CDA)**

|                            |                                            |
|----------------------------|--------------------------------------------|
| <b>Jacob Elkins</b>        | <b>Workgroup Co-Chair</b> ; Biogen         |
| <b>Jennifer Panagoulas</b> | <b>Workgroup Co-Chair</b> ; Genzyme/Sanofi |

### **COA and Data Analysis Workgroup (CDA) – Statistics Team**

|                      |                                              |
|----------------------|----------------------------------------------|
| <b>Jerry Weaver</b>  | <b>Workgroup Co-Chair</b> ; Novartis         |
| <b>Matthew Davis</b> | <b>Workgroup Co-Chair</b> ; Teva             |
| <b>Adam Jacobs</b>   | <b>Workgroup Co-Chair</b> ; Premier Research |
| Glenn Phillips       | Biogen                                       |
| Ih Chang             | Biogen                                       |
| Richard Rudick       | Biogen                                       |
| Sophia Lee           | Biogen                                       |
| Stacy Lindborg       | Biogen                                       |
| Jeffrey Cohen        | Cleveland Clinic                             |
| Bob Stafford         | Critical Path Institute                      |
| Emily Hartley        | Critical Path Institute                      |
| Gary Lundstrom       | Critical Path Institute                      |
| Lynn Hudson          | Critical Path Institute                      |
| Jeff Palmer          | Genzyme/Sanofi                               |
| Kathryn Fitzgerald   | Johns Hopkins University                     |
| Lauren Strober       | Kessler Foundation                           |
| Nicholas LaRocca     | National MS Society                          |
| Nikolaos Sfikas      | Novartis                                     |
| Shari Medendorp      | Premier Research                             |
| Gary Cutter          | University of Alabama Birmingham             |

Maria Pia Sormani  
Bernard Uitdehaag

University of Genoa  
VU University Medical Center

**COA and Data Analysis Workgroup (CDA) – Literature Review Team**

|                       |                                                             |
|-----------------------|-------------------------------------------------------------|
| <b>Glenn Phillips</b> | <b>Workgroup Co-Chair; Biogen</b>                           |
| <b>Ralph Benedict</b> | <b>Workgroup Co-Chair; State University of NY - Buffalo</b> |
| Matthew Sidovar       | Acorda                                                      |
| Jacob Elkins          | Biogen                                                      |
| Richard Rudick        | Biogen                                                      |
| William Anthony       | Boston University                                           |
| Jeffrey Cohen         | Cleveland Clinic                                            |
| Gordon Francis        | Consultant                                                  |
| Gary Lundstrom        | Critical Path Institute                                     |
| Jon Neville           | Critical Path Institute                                     |
| Lynn Hudson           | Critical Path Institute                                     |
| Jennifer Panagoulas   | Genzyme/Sanofi                                              |
| John DeLuca           | Kessler Foundation                                          |
| Lauren Strober        | Kessler Foundation                                          |
| Wendy Kaye            | McKing Consulting                                           |
| Nicholas LaRocca      | National MS Society                                         |
| Laura Balcer          | New York University                                         |
| Peter Feys            | University of Hasslet                                       |
| Robert Motl           | University of Illinois                                      |
| Robert Naismith       | Washington University                                       |

**COA and Data Analysis Workgroup (CDA) – Voice of the Patient (VOP; formerly MDP) Team**

|                         |                                                |
|-------------------------|------------------------------------------------|
| <b>Nicholas LaRocca</b> | <b>Workgroup Co-Chair; National MS Society</b> |
| <b>Deborah Miller</b>   | <b>Workgroup Co-Chair; Cleveland Clinic</b>    |
| Glenn Phillips          | Biogen                                         |
| Jacob Elkins            | Biogen                                         |
| William Anthony         | Boston University                              |
| Gordon Francis          | Consultant                                     |
| Ann Robbins             | Critical Path Institute                        |
| Gary Lundstrom          | Critical Path Institute                        |
| Lynn Hudson             | Critical Path Institute                        |
| Sarah Mann              | Critical Path Institute                        |
| Elektra Papadopoulos    | FDA                                            |
| Michelle Campbell       | FDA                                            |
| Susan Montenegro        | FDA                                            |
| Wen-Hung Chen           | FDA                                            |
| Jennifer Panagoulas     | Genzyme/Sanofi                                 |
| Nancy Chiaravalloti     | Kessler Foundation                             |
| Nancy Mayo              | McGill                                         |

|                 |                                         |
|-----------------|-----------------------------------------|
| Peter Chin      | Roche/Genentech                         |
| Barbara Vickrey | University of California at Los Angeles |
| Myla Goldman    | University of Virginia                  |
| Dagmar Amtmann  | University of Washington                |

#### **Regulatory Advisory Workgroup (RAW)**

|                     |                                                 |
|---------------------|-------------------------------------------------|
| <b>Ann Robbins</b>  | <b>Workgroup Chair;</b> Critical Path Institute |
| John Richert        | Biogen                                          |
| Richard Rudick      | Biogen                                          |
| Jeffrey Cohen       | Cleveland Clinic                                |
| Alicia West         | Critical Path Institute                         |
| Gary Lundstrom      | Critical Path Institute                         |
| Lynn Hudson         | Critical Path Institute                         |
| Jennifer Panagoulas | Genzyme/Sanofi                                  |
| Michael Panzara     | Genzyme/Sanofi                                  |
| Paul Matthews       | Imperial College London                         |
| Nicholas LaRocca    | National MS Society                             |
| Richard Meibach     | Novartis                                        |
| Peter Chin          | Roche/Genentech                                 |

#### **Data Standards and Integration Workgroup (DSI)**

|                    |                                                     |
|--------------------|-----------------------------------------------------|
| <b>Jon Neville</b> | <b>Workgroup Co-Chair;</b> Critical Path Institute  |
| <b>Ellen Mowry</b> | <b>Workgroup Co-Chair;</b> Johns Hopkins University |
| Christina Casteris | Biogen                                              |
| Robert Bermel      | Cleveland Clinic                                    |
| Bess LeRoy         | Critical Path Institute                             |
| Bob Stafford       | Critical Path Institute                             |
| Emily Hartley      | Critical Path Institute                             |
| Enrique Aviles     | Critical Path Institute                             |
| Gary Lundstrom     | Critical Path Institute                             |
| Lynn Hudson        | Critical Path Institute                             |
| Jeff Palmer        | Genzyme/Sanofi                                      |
| Paul McGuire       | Novartis                                            |
| Lauren Krupp       | Stony Brook Medicine                                |
| Jerry Wolinsky     | University of Texas                                 |
| Myla Goldman       | University of Virginia                              |
| Robert Naismith    | Washington University                               |

#### **Placebo Review Board**

|                    |                                             |
|--------------------|---------------------------------------------|
| <b>Lynn Hudson</b> | Review Board Chair; Critical Path Institute |
| Bjoern Sperling    | Biogen                                      |
| Guido Sabatella    | Biogen                                      |

Tim Swan  
Gary Lundstrom  
Kathy Smith  
Ellen Mowry  
Nicholas LaRocca  
Joshua Steiner  
Mat Davis

Biogen  
Critical Path Institute  
Fast Forward  
Johns Hopkins  
National MS Society  
Teva  
Teva

**Additional MSOAC Participants**

Andrew Blight  
Diego Cadavid  
Gilbert Litalien  
Dan Ontaneda  
June Halper  
Phillipe Truffinet  
Stephen Lake  
Steven Blum  
Brooke Dennee-Somers  
Gwyn Reis  
Giampaolo Brichetto  
Paola Zaratin  
Aaron Miller  
Karen Lee  
Susan Kohlhaas  
Eric Chamot  
John Petkau  
Andrew Goodman  
Chris Polman

Acorda  
Biogen  
Bristol-Myers Squibb  
Cleveland Clinic  
Consortium of Multiple Sclerosis Centers  
Genzyme/Sanofi  
Genzyme/Sanofi  
GlaxoSmithKline  
Ironwood  
Ironwood  
Italian Multiple Sclerosis Society  
Italian Multiple Sclerosis Society  
Mt Sinai School of Medicine  
Multiple Sclerosis Society of Canada  
Multiple Sclerosis Society UK  
University of Alabama  
University of British Columbia  
University of Rochester  
VU University Medical Center

**Supplementary Table 2: Search Terms, Databases, and Time Frame**

| SEARCH # | SEARCH TERMS                                                                                                                                                                                                                                                                                                                                                                                                                                                                                                                                                                                                                                                                                                                                                                            |
|----------|-----------------------------------------------------------------------------------------------------------------------------------------------------------------------------------------------------------------------------------------------------------------------------------------------------------------------------------------------------------------------------------------------------------------------------------------------------------------------------------------------------------------------------------------------------------------------------------------------------------------------------------------------------------------------------------------------------------------------------------------------------------------------------------------|
| S1       | multiple PRE/0 sclerosis OR "multiple sclerosis" OR MESH.EXACT("Multiple Sclerosis") OR EMB.EXACT("Multiple Sclerosis") OR tio(MS PRE/0 patient[*1])                                                                                                                                                                                                                                                                                                                                                                                                                                                                                                                                                                                                                                    |
| S2       | MESH.EXACT("Disease Progression") OR MESH.EXACT("Disability Evaluation") or ((disability or impairment or functional) and tio(impact\$2 or correlat\$3 or predict\$4 or association))                                                                                                                                                                                                                                                                                                                                                                                                                                                                                                                                                                                                   |
| S3       | (EMB.EXACT.EXPLODE("disability") OR EMB.EXACT("disease course")) and (EMB.EXACT("prediction") or predict\$4)                                                                                                                                                                                                                                                                                                                                                                                                                                                                                                                                                                                                                                                                            |
| S4       | S2 OR S3                                                                                                                                                                                                                                                                                                                                                                                                                                                                                                                                                                                                                                                                                                                                                                                |
| S5       | S1 AND S4                                                                                                                                                                                                                                                                                                                                                                                                                                                                                                                                                                                                                                                                                                                                                                               |
| S6       | S5 AND (MESH.EXACT("Patient Outcome Assessment") OR MESH.EXACT("Outcome Assessment (Health Care)") OR MESH.EXACT("Activities of Daily Living") OR MJMESH.EXACT("Quality of Life") OR MESH.EXACT("Treatment Outcome") OR MJMESH.EXACT("Neuropsychological Tests") OR EMB.EXACT("neuropsychological test") OR EMB.EXACT("daily life activity") OR EMB.EXACT("patient assessment") OR EMB.EXACT("clinical assessment tool") EMB.EXACT("neurologic disease assessment") OR EMB.EXACT("motor dysfunction assessment") OR EMB.EXACT("rating scale") OR MESH.EXACT("Psychometrics") OR MESH.EXACT("Reproducibility of Results") OR EMB.EXACT("psychometry") OR EMB.EXACT("test retest reliability") OR EMB.EXACT("predictive value") OR EMB.EXACT("validity") OR tio(validity or reliabil\$3)) |
| S7       | S6 AND su(human or humans) (SU.EXACT("Multiple Sclerosis") OR multiple pre/0 sclerosis) AND (SU.EXACT("Disabilities") OR SU.EXACT("Disease Course") OR SU.EXACT("Cognitive Assessment") OR SU.EXACT("Cognitive Impairment") OR SU.EXACT("Executive Function") OR SU.EXACT("Cognitive Ability") OR TM(multiple pre/0 sclerosis pre/0 functional pre/0 composite)) AND (MJSUB.EXACT("Quality of Life") OR SU.EXACT("Rating Scales") OR SU.EXACT("Psychometrics") OR SU.EXACT("Test Validity") OR SU.EXACT.EXPLODE("Client Attitudes")) AND POP(human)                                                                                                                                                                                                                                     |



|    |          |
|----|----------|
|    |          |
| S8 | S7 OR S8 |

Consecutive searches (search #S1-S8) were conducted using the Medline, Embase, Embase Alert, PsychInfo, and CINAHL (Cumulative Index of Nursing and Allied Health Literature) databases for the period 1990- 2016.

Research staff at Biogen conducted the search in the first three databases and McKing Consulting conducted the literature search in the CINAHL database. The results from both searches were combined into one database. Every identified article was tracked; none were discarded without explanation.

**Supplementary Table 3: Abstract Filtering Criteria and Codes**

| <b>CODE</b>             | <b>CATEGORY</b>                                                                                                              |
|-------------------------|------------------------------------------------------------------------------------------------------------------------------|
| <b><i>INCLUSION</i></b> |                                                                                                                              |
| 1                       | PerfO                                                                                                                        |
| 2                       | Both PerfO and PRO                                                                                                           |
|                         |                                                                                                                              |
| <b><i>EXCLUSION</i></b> |                                                                                                                              |
| 3                       | Case study                                                                                                                   |
| 4                       | Letters to the Editor/Editorials/Correspondences between authors/etc.                                                        |
| 5                       | Animal (only) Study                                                                                                          |
| 6                       | Pediatric (only) Study                                                                                                       |
| 7                       | Imaging (only)/Evoked Potentials Study – no outcomes                                                                         |
| 8                       | Conference Abstract                                                                                                          |
| 9                       | Pharmacokinetics/Pharmacodynamics/Lab/Biomarkers (only)                                                                      |
| 10                      | Patient reported outcome only                                                                                                |
| 11                      | Purely Qualitative no PERFO (e.g., questionnaire design) → err away from this if PERFO or PRO present in substantial amount. |
| 12                      | Economic Analysis/Risk Benefit Analysis                                                                                      |
| 13                      | No MS participants                                                                                                           |
| 14                      | Epidemiology                                                                                                                 |
| 15                      | News Articles                                                                                                                |
| 99                      | Other                                                                                                                        |
| NA                      | No Abstract – Cannot find abstract                                                                                           |
| NAX                     | No Abstract, but not deemed relevant                                                                                         |
|                         |                                                                                                                              |
| D                       | Duplicate – publication already coded and present in database                                                                |

Each abstract is coded based on the categories listed for inclusion or exclusion criteria. To be included, abstracts were required to reference disabilities, impairments, symptoms and/or impacts of symptoms experienced by people with MS, and also include reference to quantitative performance measures or patient-reported outcome measures (e.g., interviews, focus groups, patient reports, thematic analysis, grounded theory). The searches were limited to publications since 1990 and included multiple languages. Editorials, letters, abstracts, unpublished reports, reviews, and articles published in non-peer-reviewed journals were not used in the analysis.

## Supplementary Text for the Statistical Analysis Plan

**SAP Part 1: Baseline characteristics:** Continuous variables presented with descriptive statistics included the number of observations, mean, standard deviation, median, minimum, and maximum. Categorical variables were presented with the number of observations and % in each category. Each study set included the following characteristics: 1) Age as a continuous variable and in categories of < 35, 35–45, and > 45 years; 2) Sex in categories of male or female; 3) Race in categories of Native American or Alaskan, Asian, black or African American, white, and other; 4) Treatment arm as categories placebo, glatiramer acetate or interferon beta, and other; 4) MS subtype as categories RRMS, SPMS, and PPMS; 5) Duration of disease as a continuous variable and in categories < 10 years and  $\geq$  10 years; 6) Baseline EDSS score as a continuous variable and in categories 0–3.5 and 4.0–10; 7) Baseline 9HPT score as a continuous variable and in categories below the median and at or above the median; 8) Baseline LCLA score as a continuous variable and in categories below the median and at or above the median; 9) Baseline T25FW score as a continuous variable and in categories below the median and at or above the median; 10) Baseline SDMT score as a continuous variable; 11) Baseline PASAT score as a continuous variable.

**SAP Part 2: Descriptive analyses:** Descriptive analyses of the SDMT, PASAT, T25FW, 9HPT, and LCLA were carried out separately by timepoint with just 1 record per subject per timepoint (with the exception of the LOWESS smoothed graphs, which use all available data). The following statistics were generated for each timepoint, both for absolute values and change from baseline: 1) Number of observations; 2) Number of missing observations; 3) Mean; 4) Standard deviation; 5) Minimum; 6) 5<sup>th</sup> centile; 7) 1<sup>st</sup> quartile; 8) Median; 9) 3<sup>rd</sup> quartile; 10) 95<sup>th</sup> centile; 11) Maximum; and 12) Skewness. Analyses were reported for all patients combined and separately by treatment group. Analyses of each variable used the analysis set appropriate to that variable. The distribution of scores for each variable at baseline were presented graphically with a histogram. The absolute values and change from baseline for all variables (SDMT, PASAT, T5FW, 9HPT, and LCLA) over time were depicted in the following graphs: 1) Box and whisker plot of each variable by time, all patients combined; 2) Box and whisker plot of each variable by time, separate boxes for each treatment. The LOWESS graphs and box and whisker plots of SDMT and PASAT by treatment were repeated by subgroups of the baseline score of each variable, with the subgroups defined as below the 40<sup>th</sup> centile and equal to or above the 40<sup>th</sup> centile.

**SAP Part 3: Analyses of disability worsening:** Several definitions of “confirmed disability worsening” using the EDSS have been proposed, but a 1.5-point increase for patients with an EDSS of 0, a 1 point increase for patients with an EDSS of 1.0 to 5.5, or an increase of 0.5 for patients with an EDSS of 6 or greater, sustained for at least 3 or 6 months, are the most common [16,31]. The definition used to define EDSS-based disability worsening for the MSOAC analysis was a 1.5-point increase for patients with an EDSS of 0, a 1 point increase for patients with an EDSS of 1.0 to 5.5, or an increase of 0.5 for patients with an EDSS of 6 or greater, sustained for at least 3 months.

There is no universally established definition of disability worsening by the SDMT, although a number of studies have pointed to a 3- or 4-point change as clinically meaningful [14,15,32–34]. The primary definition used in this analysis was a decrease of 4 points from baseline, sustained for at least 3 months. In addition to the above definition, alternative definitions of SDMT disability worsening using a decrease of 3 points from baseline as well as 10%, 15%, and 20% decreases were used as sensitivity analyses.

The definition of disability worsening for PASAT is a decrease of 20% in the score from baseline. Decreases of 10% and 15% were used as sensitivity analyses. For T25FW, 9HPT, and LCLA, a 20% worsening from baseline (ie an increase for T25FW or 9HPT and a decrease for LCLA) was taken as the definition of disability worsening. Sensitivity analyses were conducted, in which 15% and 10% worsening was used instead of 20% worsening. For EDSS, SDMT, PASAT, T25FW, 9HPT, and LCLA, descriptive statistics (N, mean, SD, median, minimum, and maximum) were presented at each post-baseline timepoint separately for patients who have and who have not met the disability worsening criterion. Kaplan-Meier plots were produced in which the worsening by each outcome measure except EDSS was shown on the same graph as worsening by EDSS. This was done for all patients, and by subgroups according to baseline EDSS score, age, sex, and treatment group. The agreement between disability worsening at endpoint by EDSS and each other measure was assessed by calculating Cohen's kappa coefficient and its 95% confidence interval.

For each outcome measure except EDSS, characteristics of patients (age, sex, baseline EDSS score, and baseline score on the other outcome measure) with different combinations of disability worsening on EDSS and the other outcome measure were tabulated by showing summary statistics for those characteristics according to whether patients have worsened or not by each of the 2 measures (thus for 4 categories in total). Summary statistics are shown overall for patients with concordant and discordant disability worsening at endpoint.

**SAP Part 4: Reliability analyses:** Test-retest reliability analyses used data from stable patients only over a period not exceeding 6 months from baseline. A patient was defined as stable for as long as the patient's EDSS score did not change. Thus, the reliability analysis was based on all pre-baseline measurements from the first day at which the EDSS score was the same as at baseline and remained the same as at baseline, and continued for all post baseline measurements up to the last day at which the EDSS score remained the same as at baseline or up to 6 months from baseline, whichever was the sooner. The test-retest reliability of the SDMT, PASAT, T25FW, 9HPT, and LCLA was estimated by calculating the intra-class correlation coefficient from a random effects linear regression analysis with a random subject effect and terms to account for practice effects. The fit of the model was examined by regression diagnostic plots of within-subject residuals from the model. The within-subject residual standard deviation of the SDMT, PASAT, T25FW, 9HPT, or LCLA score was also reported. Practice effects were determined by examining the regression coefficients for test number from the above model. Cohen's d was calculated from those terms as a measure of the effect size of practice effects, by dividing the regression coefficients by the pooled standard deviation of all

scores included in the model. This analysis was carried out for all patients combined, and for subgroups of baseline EDSS score, disease duration, and age.

**SAP Part 5: Construct validity analyses:** To investigate the construct validity of the outcome measures, correlations were investigated between each outcome measure and other outcome measures. For each pair of measures, scatterplots were produced showing the correlation between the measures graphically. Correlation coefficients between each pair of variables were calculated: For baseline, endpoint, and change from baseline at endpoint, both the Pearson and Spearman correlation coefficients were calculated, together with their 95% confidence intervals (using Fisher's transformation). These analyses were done for all patients, and by subgroups of age, baseline EDSS, baseline 9HPT score, baseline LCLA score, and disease duration.

**SAP Part 6: Convergent validity analyses:** To investigate convergent validity, correlations between the following measures were investigated: 1) SDMT with PASAT; 2) T25FW with EDSS; 3) 9HPT with EDSS; 4) LCLA with high contrast visual acuity, visual functional systems score. The same analyses as described for construct validity were used.

**SAP Part 7: Known group analyses:** Baseline outcome measure scores were compared between groups of patients with short and long disease duration and between patients with high and low EDSS scores. The baseline score for each outcome measure (SDMT, PASAT, T25FW, 9HPT, and LCLA) was compared between the groups using an ANOVA model adjusting for age in 5-year age bands. The mean difference was presented along with its 95% confidence interval and P value; age effects from this model were also presented.

**SAP Part 8: Analysis of sensitivity to change:** Sensitivity to change was assessed by comparing scores for SDMT, PASAT, T25FW, 9HPT, and LCLA before and after relapse. Post-relapse scores were included in this analysis if they are measured within 3 months after the start of the relapse. The scores were compared with a paired t-test. Sensitivity to change was also assessed by examining change in groups of patients who either worsen or improve according to their EDSS score. For comparisons based on EDSS score, the baseline score of the relevant measure was compared with the first score on or after the date on which the EDSS score meets the definition of worsening or improvement. The scores from baseline to improvement or worsening were compared with a paired t-test. The above analyses of worsening events (before relapse to during relapse and from baseline to EDSS worsening) were also broken down by treatment groups and by subgroups of the baseline score of the measure being analyzed. In addition to the above analysis, the cumulative distribution of changes was calculated. Thus for each integer change in the score from zero up to a 10-unit change, and thereafter in 5-unit change categories up to the maximum score observed on worsening, (by either relapse or EDSS), the number and percentage of patients (using all patients with scores before and after worsening as the denominator) who have changed by that score or less on worsening were calculated. A similar analysis was done for improvement, calculating the number and percentage of patients who have changed by that score or more on improvement.

**SAP Part 9: Determination of a minimum clinically important difference: .this section describes Minimal Important Change (MIC) not MID.** The minimum clinically important difference for SDMT, T25FW, 9HPT, and LCLA was determined by reference to the PCS score from the SF-36 (or SF-12). A 5-point change in the PCS score was considered a minimum clinically important difference. To this end, each of those variables was used in a linear regression model in which the change from baseline at endpoint in the PCS score was the dependent variable and the change from baseline at endpoint in the variable being investigated was the independent variable (the variables were taken at the same timepoint, so if only one variable was available at the end of the study, the latest time point where both variables were measured within 7 days of each other was used). That model was used to predict the change from baseline in each variable that corresponds to a change from baseline in PCS of 5 points, and was taken as the minimum clinically important difference. Norman et al (2003)<sup>1</sup> observed that an effect size of 0.5 is generally a good approximation to a clinically meaningful difference. The effect size corresponding to the minimum clinically important change, calculated as described above, was calculated using the standard deviation of baseline scores. An effect size close to 0.5 provides further confidence that the minimum clinically meaningful change has been defined.

<sup>1</sup>Norman GR, Sloan JA, Wyrwich KW. Interpretation of Changes in Health-Related Quality of Life: The Remarkable Universality of Half a Standard Deviation. *Medical Care*. 2003 May;41(5):582–92.
